# Supplementary material for: An excited state intramolecular proton transfer induced phosphate ion targeted ratiometric fluorescent switch to monitor phosphate ions in human peripheral blood mononuclear cells
Source: Royal Society of Chemistry journal article supplement (doi:10.1039/d2dt00581f), 2022-01-01
Supplement: d2dt00581f1.pdf [file d2dt00581f1.pdf]

## Supporting Information

# Excited state intramolecular proton transfer induced phosphate ion targeted ratiometric fluorescent switch to monitor phosphate ion in human peripheral blood mononuclear cells

Sangita Das,<sup>a\*</sup> Partha Pratim Das,<sup>b</sup> James. W. Walton,<sup>a</sup> Kakali Ghoshal,<sup>c</sup> Lakshman Patra,<sup>d</sup> and Maitree Bhattacharyya<sup>c</sup>

<sup>a</sup> Durham University, Department of Chemistry, Durham, DH1 3LE, UK, Email: sangita.das@durham.ac.uk

<sup>b</sup> Center for Novel States of Complex Materials Research, Seoul National University, Seoul, 08826, Republic of Korea

<sup>c</sup> Department of Biochemistry, University of Calcutta, Kolkata-700019, India

<sup>d</sup> Jadavpur University, Jadavpur

|                                                                                                           |  |
|-----------------------------------------------------------------------------------------------------------|--|
| 1. <b>Experimental-General</b> .....                                                                      |  |
| 2. <b>Determination of detection limit</b> .....                                                          |  |
| 3. <b>Linear responsive curve (UV-Vis) of BTP depending on <math>PO_4^{3-}</math> concentration</b> ..... |  |
| 4. <b>Determination of binding constant</b> .....                                                         |  |
| 5. <b>Job's Plot</b> .....                                                                                |  |
| 6. <b>Determination of fluorescence Quantum Yield</b> .....                                               |  |
| 7. <b>pH study</b> .....                                                                                  |  |
| 8. <b>UV-Vis and Fluorescence study of BTP in presence of other guest analytes</b> .....                  |  |
| 9. <b>Comparison Study of Reversibility Experiment</b> .....                                              |  |
| 10. <b>IR Spectra of BTP</b> .....                                                                        |  |
| 11. <b>Fluorescence life time data of BTP</b> .....                                                       |  |
| 12. <b>Truth table for INHIBIT Logic Gate</b> .....                                                       |  |
| 13. <b><math>^1H</math> NMR spectrum of BTP</b> .....                                                     |  |
| 14. <b><math>^{13}C</math> NMR spectrum of BTP</b> .....                                                  |  |
| 15. <b>Mass spectrum (ESI-MS) of BTP</b> .....                                                            |  |
| 16. <b><math>^1H</math> NMR titration of BTP with <math>PO_4^{3-}</math></b> .....                        |  |
| 17. <b>Comparison Study</b> .....                                                                         |  |

## ***1. Experimental***

### ***General:***

Chemicals and solvents were purchased from Sigma-Aldrich and used without further purification. Silica gel (100-200 mesh, Merck) was used for column chromatography. NMR spectra were recorded on a Varian VXR-400 spectrometer ( $^1\text{H}$  at 300 MHz,  $^{13}\text{C}$  at 75 MHz) at 298 K in commercially available  $d^6$  DMSO, with TMS as an internal standard. Chemical shifts are expressed in  $\delta$  units and coupling constants in Hz. UV-Vis spectra were recorded using a Cary 5000 high performance UV-Vis-NIR spectrophotometer, controlled by Cary WinUV software. Fluorescence was recorded using a Horiba Fluorolog-3 spectrometer using FluorEssence software. IR spectra were recorded on a JASCO FT/IR-460 plus spectrometer, using KBr discs. Melting points were determined on a hot-plate melting point apparatus in an open-mouth capillary and are uncorrected.

### ***General method of UV-Vis absorption and fluorescence emission titrations:***

For both UV-Vis and fluorescence titrations, a stock solution of **BTP** was prepared (10  $\mu\text{M}$ ) in  $\text{CH}_3\text{OH}$ - $\text{H}_2\text{O}$  (1/4, v/v) in the presence of HEPES buffer (10 mM) solution at pH = 7.2. The solution of the guest anions using their sodium salts at 10  $\mu\text{M}$  were prepared in buffered deionised water at pH 7.2. The absorption spectra of these solutions were recorded by means of UV-Vis methods using a 10 mm path length quartz cuvette. Fluorescence emission was measured in a 10 mm path length quartz cuvette with the excitation wavelength 380 nm. Fluorescence lifetimes were measured using a time-resolved spectrofluorometer from IBH, UK. The instrument uses a picoseconds diode laser (NanoLed-07, 380 nm) as the excitation source and works on the principle of time-correlated single photon counting. The goodness of fit was evaluated by  $\chi^2$  criterion and visual inspection of the residuals of the fitted function to the data.

### ***Details of bio-imaging***

#### ***Materials Methods***

We have conducted an experiment to validate the ability of **BTP** to detect intracellular phosphate. For this purpose, we have isolated peripheral blood mononuclear cells (PBMCs) from venous blood. Approximately 10 ml venous blood was obtained from a healthy, male volunteer donor (age - 32 years) with his informed consent. PBMCs were isolated by density gradient centrifugation utilizing histopaque-1077 gradient [SIGMA]. PBMCs were washed two times with HEPES buffer (SIGMA) and suspended serum-free DMEM supplemented with 2 mmol/l l-glutamine and 50  $\mu\text{g}/\text{ml}$  gentamicin having

approximately  $3 \times 10^6$  cells. The cells were incubated with  $500 \mu\text{M}$  Pi or  $5\text{mM}$  ATP at  $37^\circ\text{C}$  for 2 hours at 5%  $\text{CO}_2$  and 95% air. Then the cells treated with ATP were incubated with 1U, 1.5U or 2U of apyrase for 1 hour respectively. After that, the cells were incubated with  $10 \mu\text{M}$  of BTP and incubated for 1 hour at  $37^\circ\text{C}$ . Cells were washed twice with 1ml HEPES buffer. Intracellular fluorescence intensity was detected under a fluorescence microscope (Carl Zeiss HBO 100) under 40X magnification with fluorescence emissions at  $560 \text{ nm}$  ( $540 \text{ nm} - 570 \text{ nm}$ , Yellow channel) and  $480 \text{ nm}$  ( $480 \text{ nm} - 530 \text{ nm}$ , Green channel), respectively.

### ***MTT assay***

To determine cell viability against **BTP**, PBMCs were treated with different concentrations of **BTP** solution ( $5\text{-}50 \mu\text{M}$ ) with or without Pi ( $500 \mu\text{M}$ ) for 1 hour at  $37^\circ\text{C}$  against control cell suspension without **BTP**. Cell density remains  $0.05 \times 10^6$  cells per well in a 96- well plate.  $100 \mu\text{l}$  of MTT solution ( $5 \text{ mg/ml}$ ) was added to each well including control and incubated for 4 hours at  $37^\circ\text{C}$ . The purple-colored formazan crystals were dissolved with  $100 \mu\text{l}$  DMSO and the absorbance were measured at  $570 \text{ nm}$ . Cell viability was calculated using the following calculation:

$$\% \text{ of Cell Viability} = \frac{(\text{Absorbance of treatment group} - \text{blank})}{(\text{Absorbance of control group} - \text{blank})} \times 100$$

### ***2. Determination of detection limit:***

The detection limit was calculated based on the fluorescence titration. To determine the S/N ratio, the emission intensity of **BTP** without  $\text{PO}_4^{3-}$  was measured by 10 times and the standard deviation of blank measurements was determined. The detection limit (DL) of **BTP** for  $\text{PO}_4^{3-}$  was determined from the following equation:  $\text{DL} = K \times \text{Sb}_1/\text{S}$  where  $K = 2$  or  $3$  (we take 3 in this case);  $\text{Sb}_1$  is the standard deviation of the blank solution; S is the slope of the calibration curve. For  $\text{PO}_4^{3-}$ : From the graph we get slope =  $81061.3736$ , and  $\text{Sb}_1$  value is  $0.00225$ . Thus using the formula we get the Detection Limit =  $8.33 \times 10^{-8} \text{ M}$  i.e. **BTP** can detect  $\text{PO}_4^{3-}$  in this minimum concentration by fluorescence techniques.

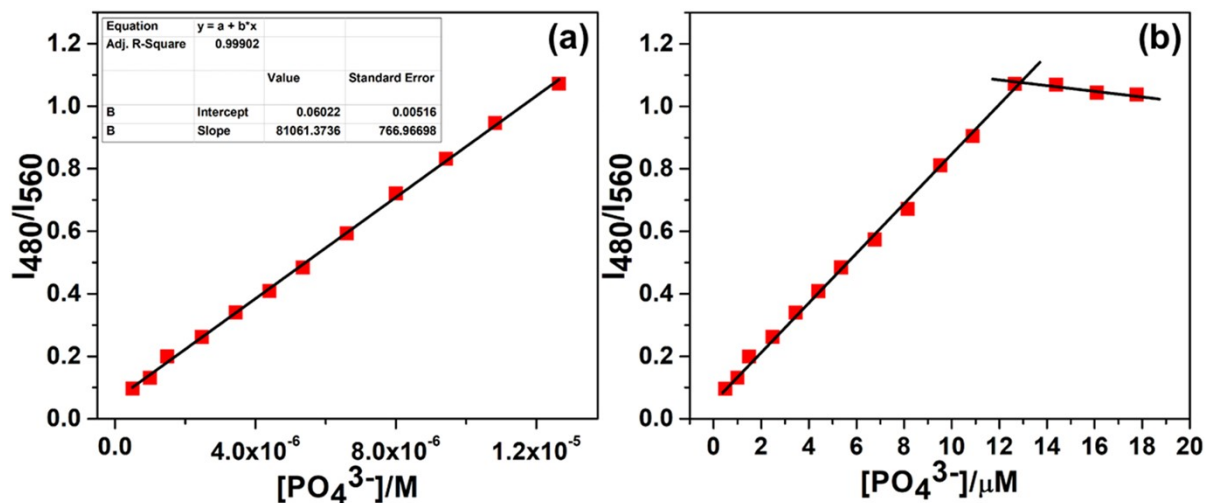

Figure S1: Emission intensity ratio  $I_{480}/I_{560}$  of BTP depending on the concentration of  $PO_4^{3-}$

### 3. Linear responsive curve BTP depending on $PO_4^{3-}$ concentration:

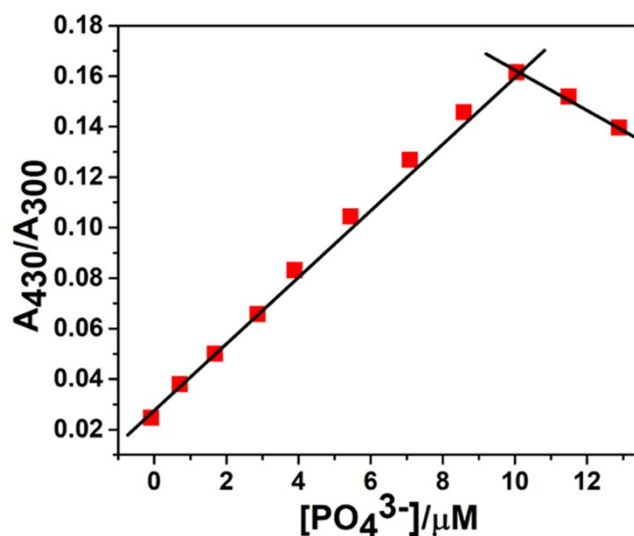

Figure S2: UV-Vis intensity ratio  $A_{430}/A_{300}$  of BTP respectively depending on the concentration of  $PO_4^{3-}$

### 4. Determination of binding constant

#### By Fluorescence method:

Association constant was calculated according to the Benesi-Hildebrand equation.  $K_a$  was calculated following the equation stated below.

$$1/(I-I_0) = 1/\{K(I_{\max}-I_0) [M^{X^+}]^n\} + 1/[I_{\max}-I_0]$$

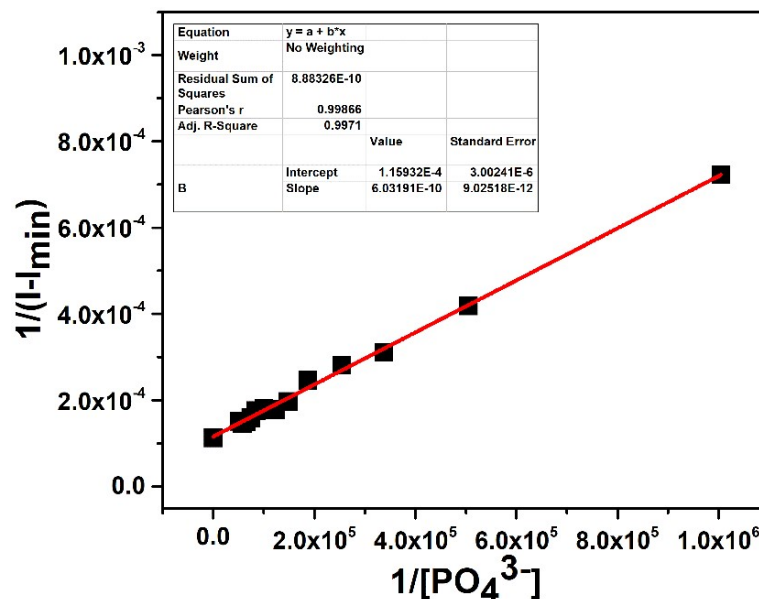

**Figure S3:** Benesi–Hildebrand plot from UV-Vis titration data of receptor **BTP** (10  $\mu\text{M}$ ) with  $\text{PO}_4^{3-}$ .

Here  $I_0$  is the emission of receptor in the absence of guest,  $I$  is the emission recorded in the presence of added guest,  $I_{\max}$  is emission in presence of added  $[\text{M}^{X^+}]_{\max}$  and  $K_a$  is the association constant, where  $[\text{M}^{X^+}]$  is  $[\text{PO}_4^{3-}]$ . The association constant ( $K_a$ ) could be determined from the slope of the straight line of the plot of  $1/(I-I_0)$  against  $1/[\text{PO}_4^{3-}]$  and is found to be  $1.92 \times 10^5 \text{ M}^{-1}$ .

## 5. Job's Plot

Stock solution of same concentration of the receptors and the guest were prepared in the order of  $2.0 \times 10^{-5} \text{ ML}^{-1} \text{ CH}_3\text{OH-H}_2\text{O}$  (1:1, v/v). The emission in each case with different *host-guest* ratio but equal in volume was recorded. Job plots were drawn by plotting  $\Delta I$ .  $X_{\text{host}}$  vs  $X_{\text{host}}$  ( $\Delta I$  = change of intensity of the emission spectrum during titration and  $X_{\text{host}}$  is the mole fraction of the host).

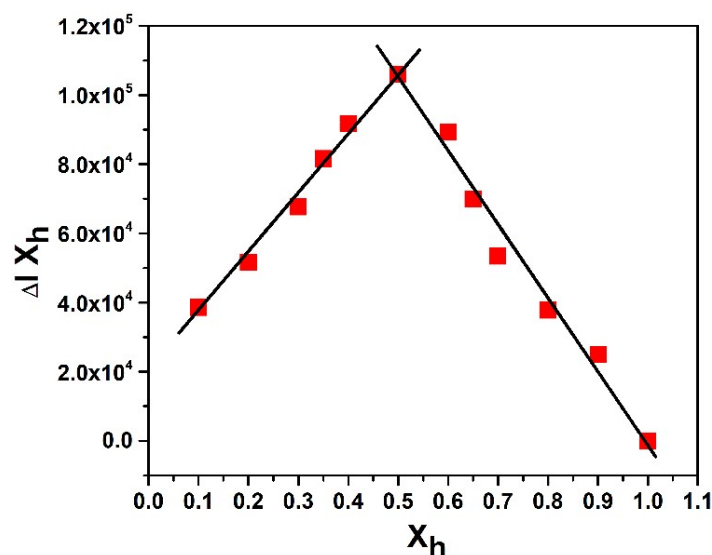

**Figure S4:** Job plot diagram of **BTP** with  $\text{PO}_4^{3-}$  (where  $X_h$  is the mole fraction of **BTP** and  $\Delta I$  indicates the change of emission at 480 nm).

#### 6. Determination of fluorescence Quantum Yield ( $\Phi$ ) of BTP and its complex with $\text{PO}_4^{3-}$

To measure the quantum yields of **BTP** and its complex with  $\text{PO}_4^{3-}$ , the absorbance of the compounds in methanol solution were recorded. The emission spectra were then recorded using the maximum excitation wavelengths, and the integrated areas of the fluorescence-corrected spectra were measured. The quantum yield of **BTP** was then calculated by comparison with fluorescein ( $\Phi_s = 0.97$  in basic ethanol) as a reference. The quantum yield of **BTP** -  $\text{PO}_4^{3-}$  was calculated by comparison with rhodamine B ( $\Phi_s = 0.66$  in ethanol) as a reference. In each case the following equation was used:

$$\Phi_x = \Phi_s \times \left(\frac{Ix}{Is}\right) \times \left(\frac{As}{Ax}\right) \times \left(\frac{nx}{ns}\right)^2$$

where,  $x$  and  $s$  indicate the unknown and standard solution, respectively,  $\Phi$  is the quantum yield,  $I$  is the integrated area under the fluorescence spectra,  $A$  is the absorbance and  $n$  is the refractive index of the solvent. The quantum yield calculated for BTP using the above equation was 0.26. The quantum yield calculated for BTP- $\text{PO}_4^{3-}$  using the above equation was 0.44.

## 7. pH Study:

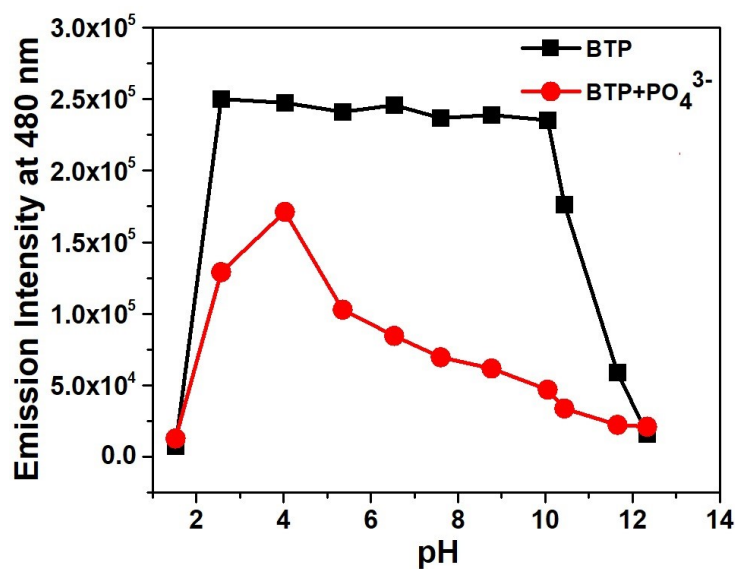

**Figure S5:** Fluorescence response of **BTP** and **BTP-PO<sub>4</sub><sup>3-</sup>** as a function of pH in CH<sub>3</sub>OH/H<sub>2</sub>O (1/4, v/v), pH is adjusted by using aqueous solutions of 1 M HCl or 1 M NaOH.

## 8. UV-Vis and Fluorescence study of BTP in presence of other guest analytes.

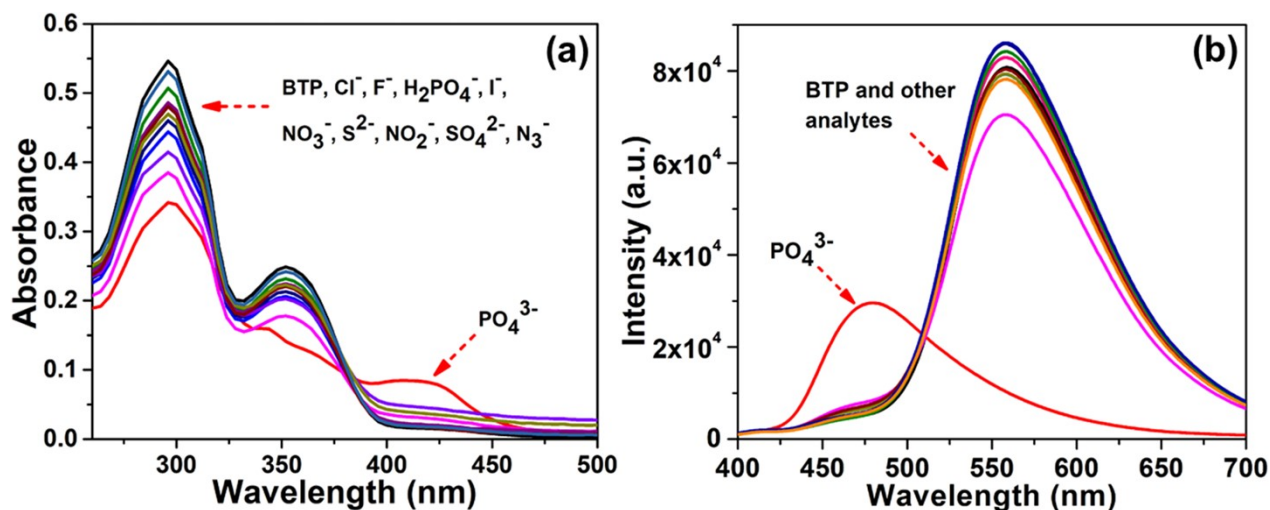

**Figure S6:** (a) UV-vis spectra and (b) Fluorescence spectra of **BTP** upon gradual addition of 5 equivalents of stated guest anions. **BTP** (10  $\mu$ M) in MeOH/H<sub>2</sub>O (1/4, v/v), HEPES buffer (10 mM), pH 7.2, 25  $^{\circ}$ C.

### Comparison studies with cations:

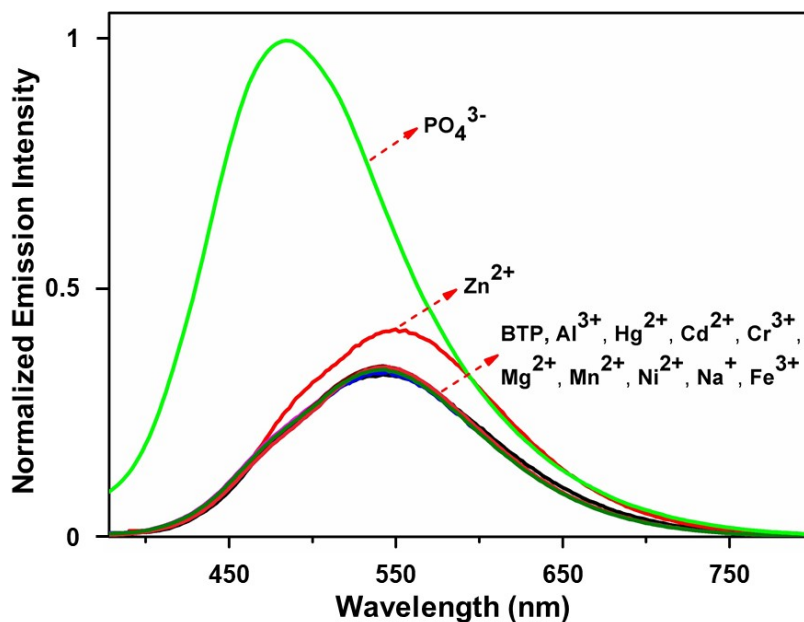

**Figure S6 C:** Fluorescence spectra of **BTP** upon gradual addition of 3 equivalents of stated guest cations. **BTP** (10  $\mu\text{M}$ ) in MeOH/H<sub>2</sub>O (1/4, v/v), HEPES buffer (10 mM), pH 7.2, 25 °C.

### 9. Comparison Study of Reversibility Experiment

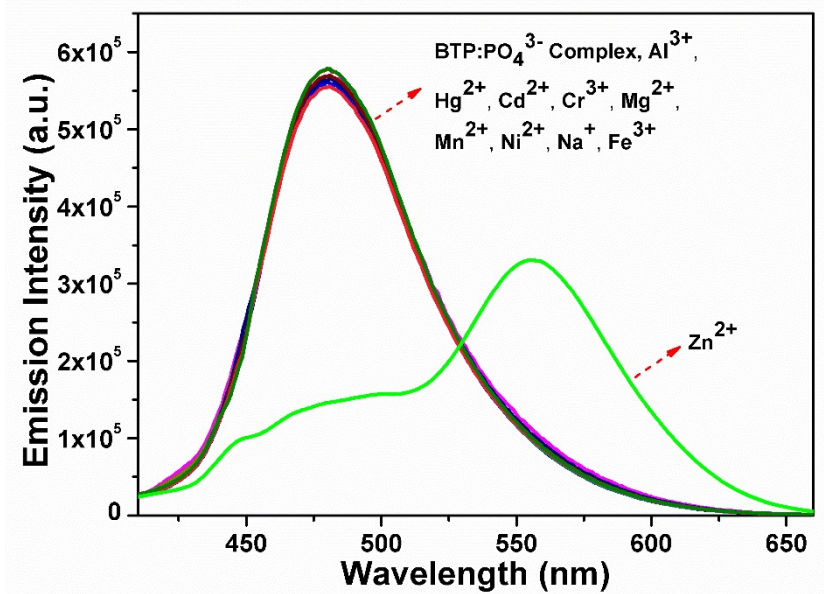

**Figure S7:** Fluorescence spectra of **BTP-PO<sub>4</sub><sup>3-</sup>** upon gradual addition of 5 equivalents of stated guest cations. **BTP-PO<sub>4</sub><sup>3-</sup>** (10  $\mu\text{M}$ ) in MeOH/H<sub>2</sub>O (1/4, v/v), HEPES buffer (10 mM), pH 7.2, 25 °C.



## 10. IR spectra of BTP

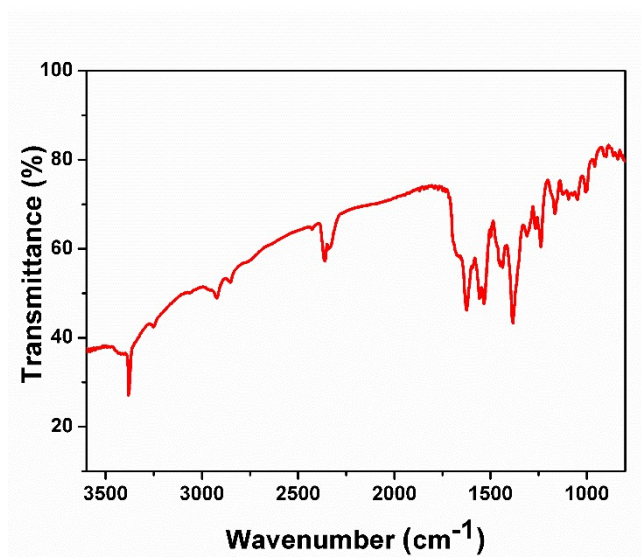

Figure S8: FT-IR spectrum of BTP

## 11. Fluorescence life time of BTP

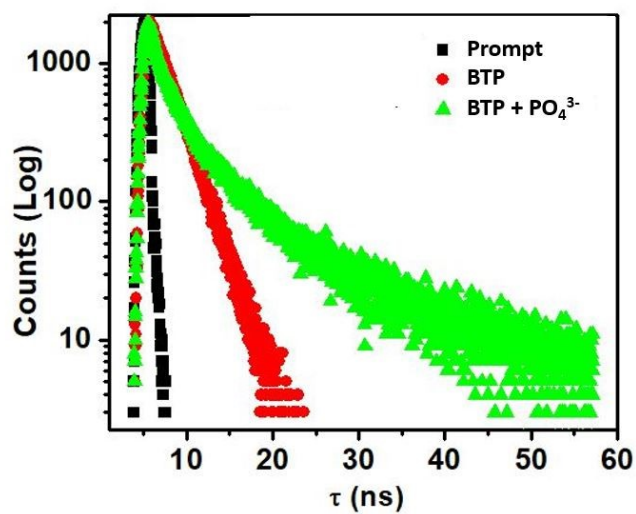

Figure S9: Time-resolved fluorescence decay of **BTP** (Red) and **BTP** + PO<sub>4</sub><sup>3-</sup> (Green).

**Table S1** Fluorescence lifetime data of **BTP**

| Entry            | $\Phi$ | $\tau$ (ns) | $k_r$ ( $10^8 \times s^{-1}$ ) | $k_{nr}$ ( $10^8 \times s^{-1}$ ) |
|------------------|--------|-------------|--------------------------------|-----------------------------------|
| BTP              | 0.26   | 2.31        | 1.16                           | 3.16                              |
| BTP- $PO_4^{3-}$ | 0.44   | 4.66        | 0.94                           | 1.19                              |

**12. Truth table for INHIBIT Logic Gate**

**Table S2**

| Input 1 ( $PO_4^{3-}$ ) | Input 2 ( $Zn^{2+}$ ) | Output (Emission intensity at 480 nm) |
|-------------------------|-----------------------|---------------------------------------|
| 0                       | 0                     | 0                                     |
| 1                       | 0                     | 1                                     |
| 0                       | 1                     | 0                                     |
| 1                       | 1                     | 0                                     |

13. <sup>1</sup>H NMR spectrum of BTP:

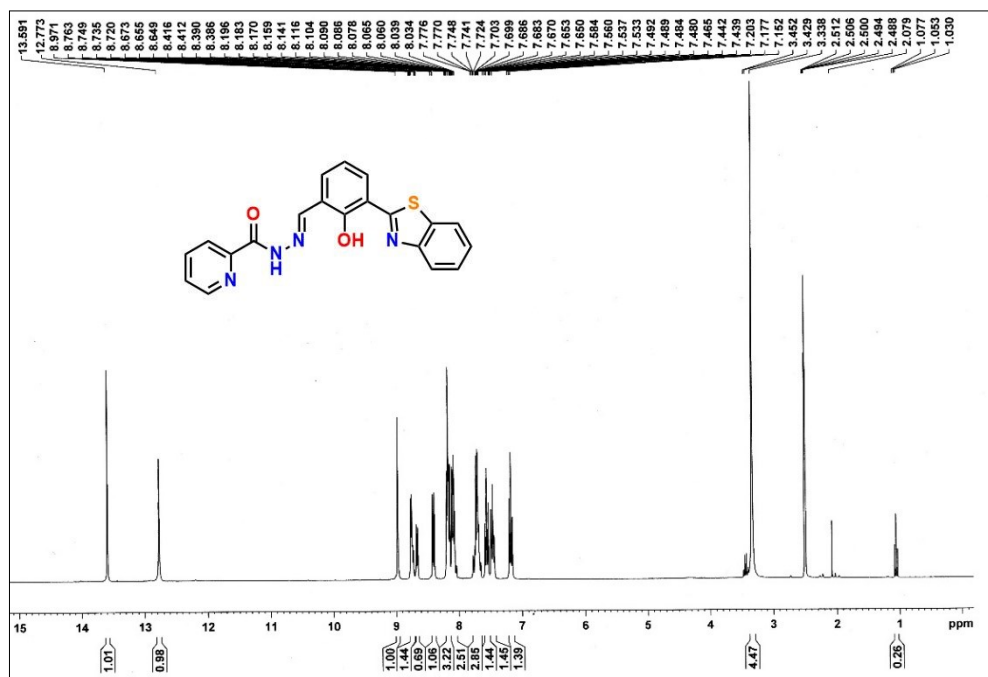

Figure S10: <sup>1</sup>H NMR (300 MHz) spectrum of BTP in d<sub>6</sub>-DMSO (298 K).

14. <sup>13</sup>C NMR spectrum of BTP

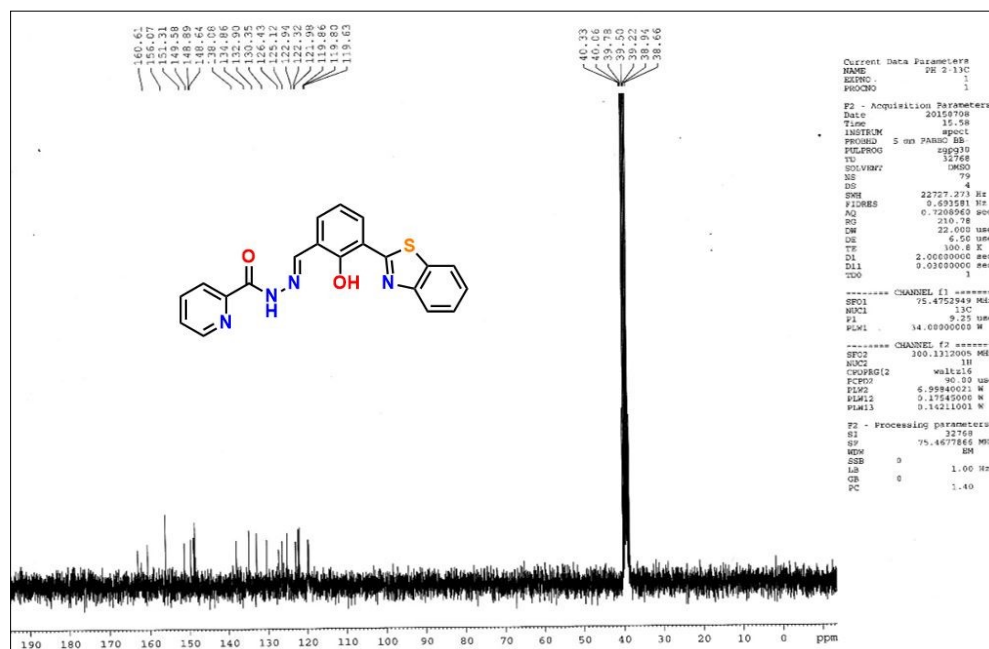

Figure S11: <sup>13</sup>C NMR (75 MHz) spectrum of BTP in d<sub>6</sub>-DMSO (298 K).

15. HRMS of BTP:

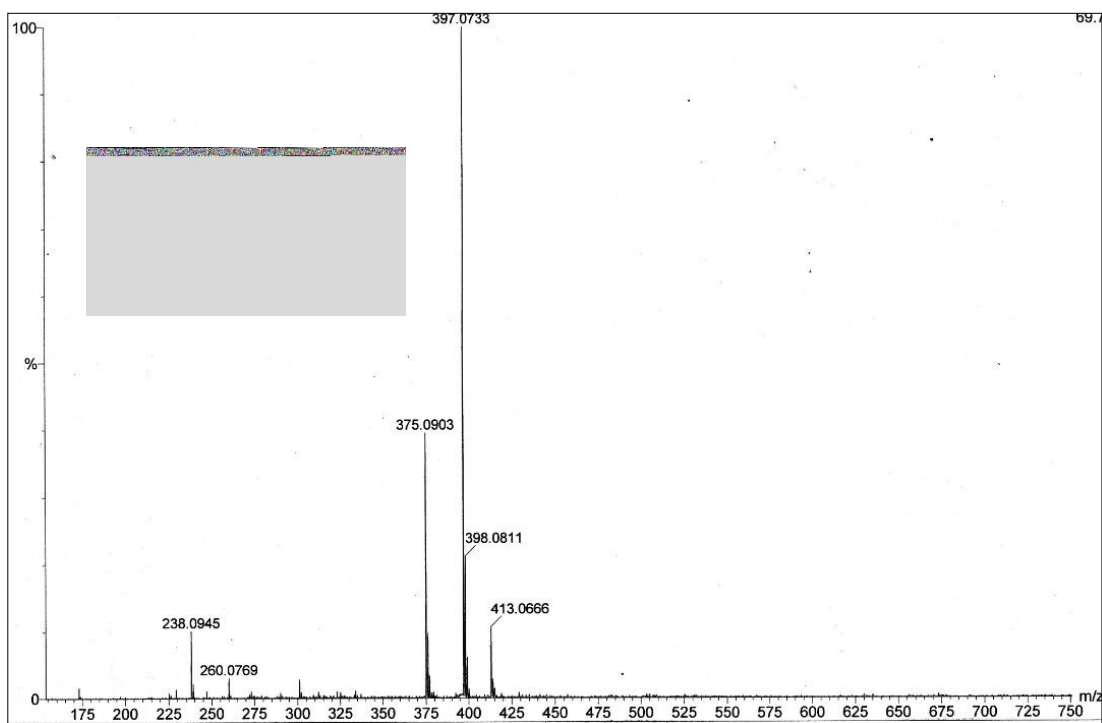

Figure S12: HRMS spectrum of the BTP (positive ESI mode)

16.  $^1\text{H}$  NMR titration of BTP with  $\text{PO}_4^{3-}$

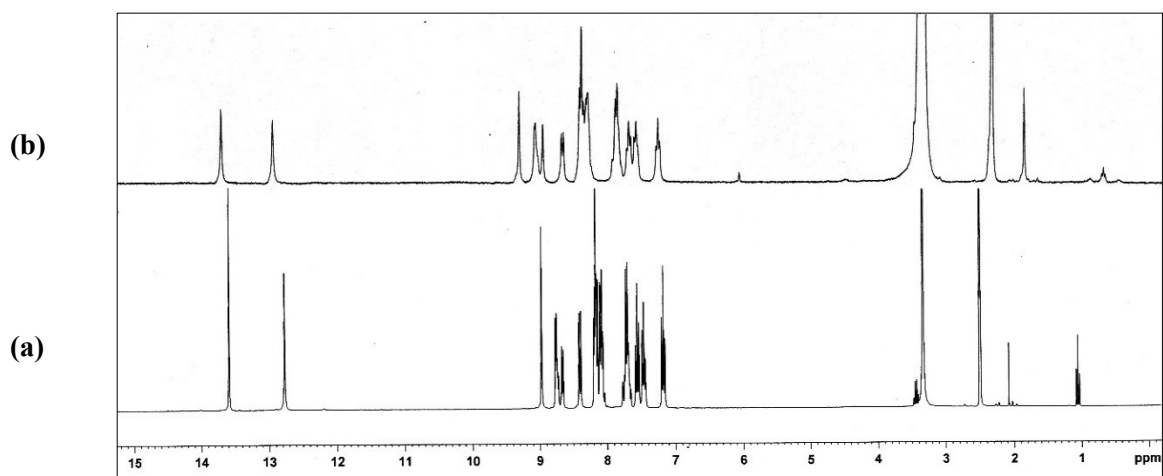

Figure S13: Partial  $^1\text{H}$  NMR (300 MHz) spectra of (a) PBT and (b) PBT +  $\text{PO}_4^{3-}$  in  $d_6$ -DMSO.

$[\text{BTP}] = 2.12 \times 10^{-3} \text{ M}$ ;  $[\text{PO}_4^{3-}] = 4.24 \times 10^{-3} \text{ M}$  (298 K).

### 17. Comparison Study:

| Sr. No | Fluorophore Used                                     | Ratiometric Fluorescence Change | Detection Limit         | Bioimaging Studies (endogenous phosphate detection) | References                            |
|--------|------------------------------------------------------|---------------------------------|-------------------------|-----------------------------------------------------|---------------------------------------|
| 1.     | Dimethylcarbamodithioate-calix[4]arene               | No                              | 7.9 nM                  | No                                                  | Tetrahedron Letters, 2021, 71, 153046 |
| 2.     | Coumarin                                             | No                              | $8.11 \times 10^{-7}$ M | Yes                                                 | Anal. Chem. 2015, 87, 2, 1196–1201    |
| 3.     | Pyridine–Biquinoline                                 | No                              | 0.85 $\mu$ M            | Yes (But not endogenous phosphate detection)        | 10.1021/ac504536q                     |
| 4.     | methylphenol with 4-(1Hbenzo[d]imidazol-2-yl)aniline | No                              | 1.67 nM                 | Yes (But not endogenous phosphate detection)        | Anal. Chem. 2015, 87, 13, 6974–6979.  |
| 5.     | BINOL                                                | No                              | 95 nM                   | Yes (But not endogenous phosphate detection)        | 10.1039/c4an01615g                    |
| 6.     | Dihydroxyaniline bisimidazolium derivative           | No                              | 5.4 ppb                 | Yes (But not endogenous phosphate detection)        | 10.1039/C4C00752B.                    |
| 7.     | 2-hydroxybenzohydrazide                              | No                              | 2.7 nM                  | No                                                  | 10.1039/c4dt01799d                    |
| 8.     | Cyanine dye                                          | Yes                             | $9.37 \times 10^{-7}$ M | Yes                                                 | 10.1016/j.dye pig.2016.04.032         |
| 9.     | Benzo[d]thiazol-2-yl)-2-picolinohydrazide            | Yes                             | $8.33 \times 10^{-8}$ M | Yes                                                 | Present Work                          |
